# Supplementary material
Source: PubMed Central journal article supplement (PMC4520703)
Supplement: NIHMS700032-supplement-2.pdf [file NIHMS700032-supplement-2.pdf]

**Supplemental Information**

**UBE3A regulates synaptic plasticity and learning and memory by controlling SK2 channel endocytosis**

**Supplemental Figure S1, Related to Figure 1**

**Supplemental Figure S2, Related to Figure 2**

**Supplemental Figure S3, Related to Figure 3**

**Supplemental Figure S4, Related to Figure 4**

**Supplemental Figure S5, Related to Figure 5**

**Supplemental Figure S6, Related to Figure 5**

**Supplemental Figure S7, Related to Figures 6 and 7**

**Supplemental Experimental Procedures, Related to Experimental Procedures**

**Supplemental References**
